# Supplementary material for: Ratiometric fluorescence determination of the anthrax biomarker 2,6-dipicolinic acid using a Eu3+/Tb3+-doped nickel coordination polymer
Source: Royal Society of Chemistry journal article supplement (doi:10.1039/c9nj04501e), 2019-01-01
Supplement: c9nj04501e1.pdf [file c9nj04501e1.pdf]

## Supporting Information

### Ratiometric Fluorescence Determining the Anthrax Biomarker 2,6-Dipicolinic Acid by $\text{Eu}^{3+}/\text{Tb}^{3+}$ -doped Nickel Coordination Polymer

Hang Lei, Cui-Xing Qi, Xuan-Bo Chen, Tian Zhang, , Ling Xu\* and Bing Liu\*

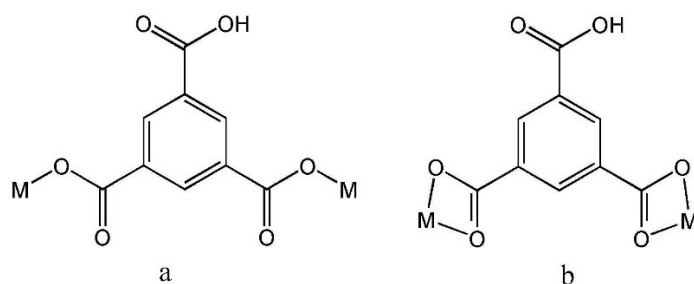

**Scheme S1.** The coordination fashions of HBTC<sup>2-</sup> ligands in Ni-BTC.

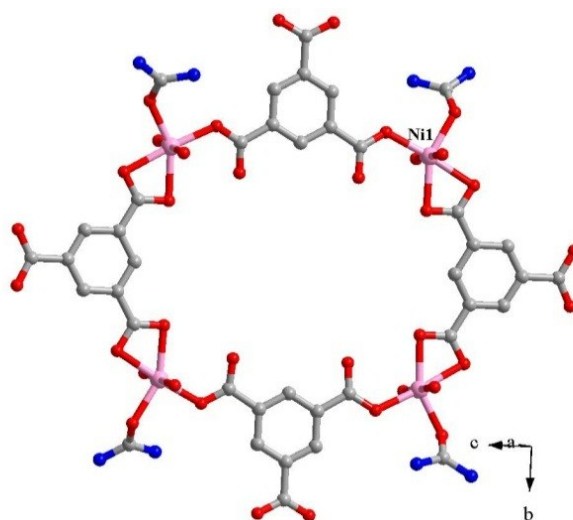

**Fig. S1.** The structure motif of discrete Ni-BTC with 32-membered ring.

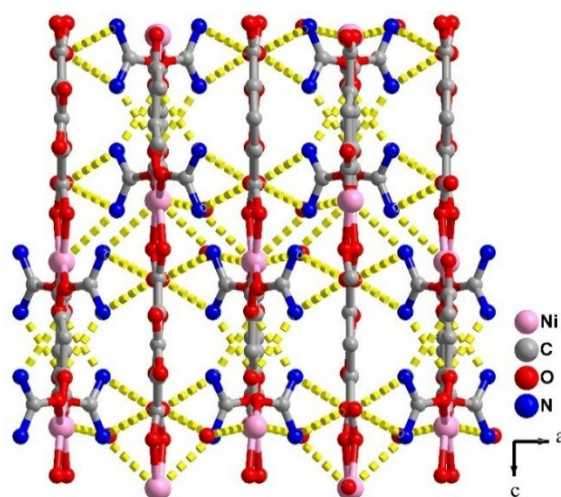

**Fig. S2.** The 3D supramolecular framework of Ni-BTC constructed by H-bondings.

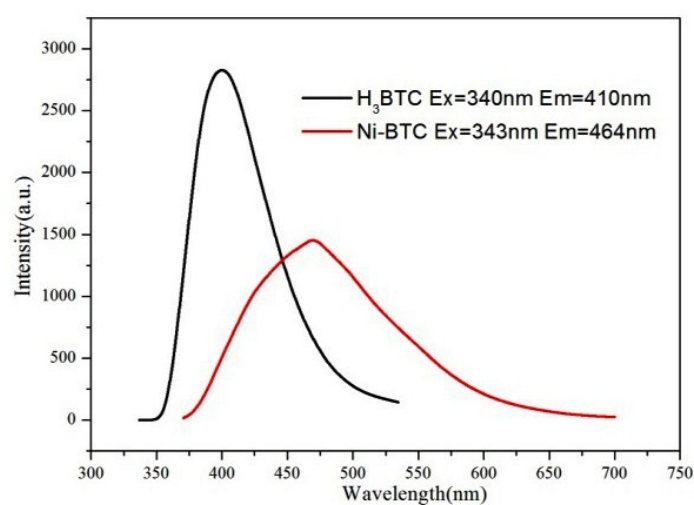

**Fig. S3.** The solid-state emission spectra of free H<sub>3</sub>BTC ligand with  $\lambda_{\text{ex}} = 340$  nm and Ni-BTC with  $\lambda_{\text{ex}} = 343$  nm.

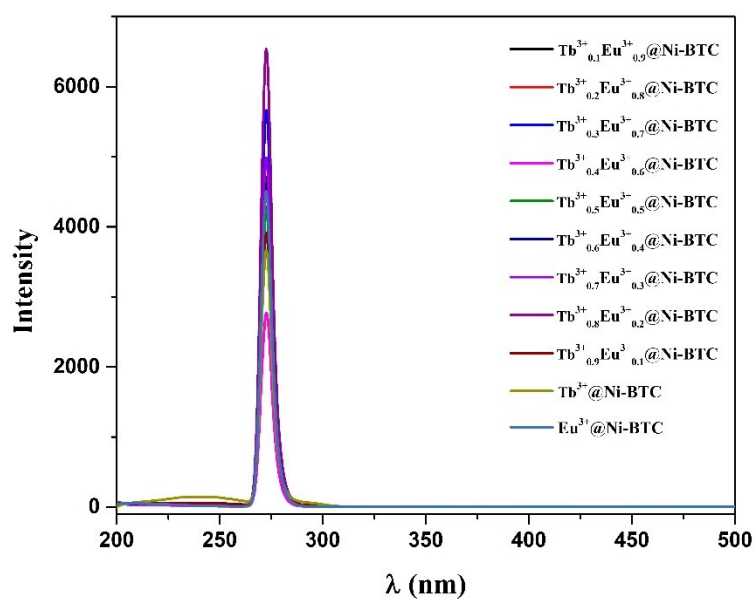

**Fig. S4.** The excitation spectra of  $\text{Tb}^{3+}/\text{Eu}^{3+}@/\text{Ni-BTC}$  composites with comparison of that of  $\text{Tb}^{3+}@/\text{Ni-BTC}$  and  $\text{Eu}^{3+}@/\text{Ni-BTC}$ .

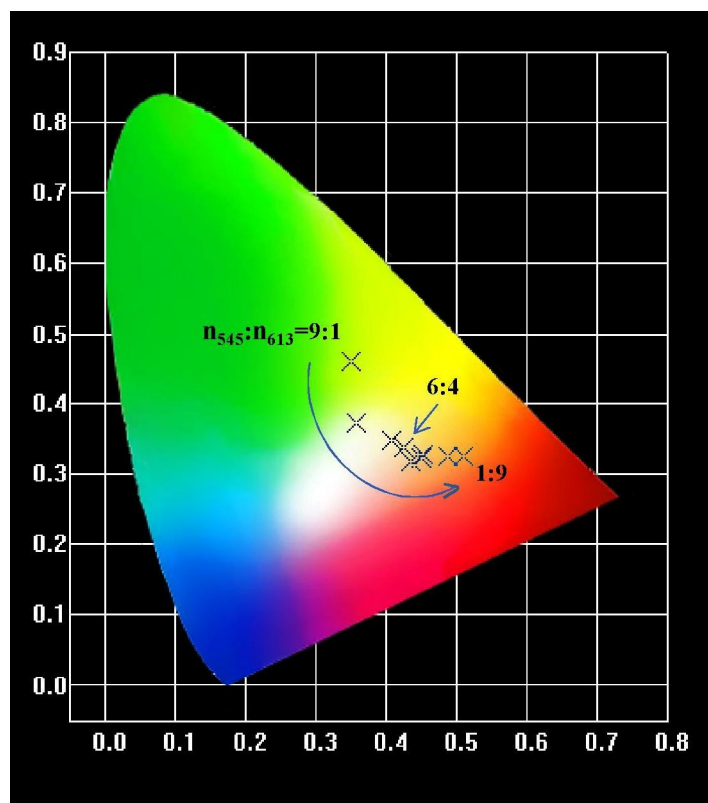

**Fig. S5.** The CIE 1931 chromaticity diagram together with the calculated color coordinate of  $\text{Tb}^{3+}/\text{Eu}^{3+}@/\text{Ni-BTC}$  composites.

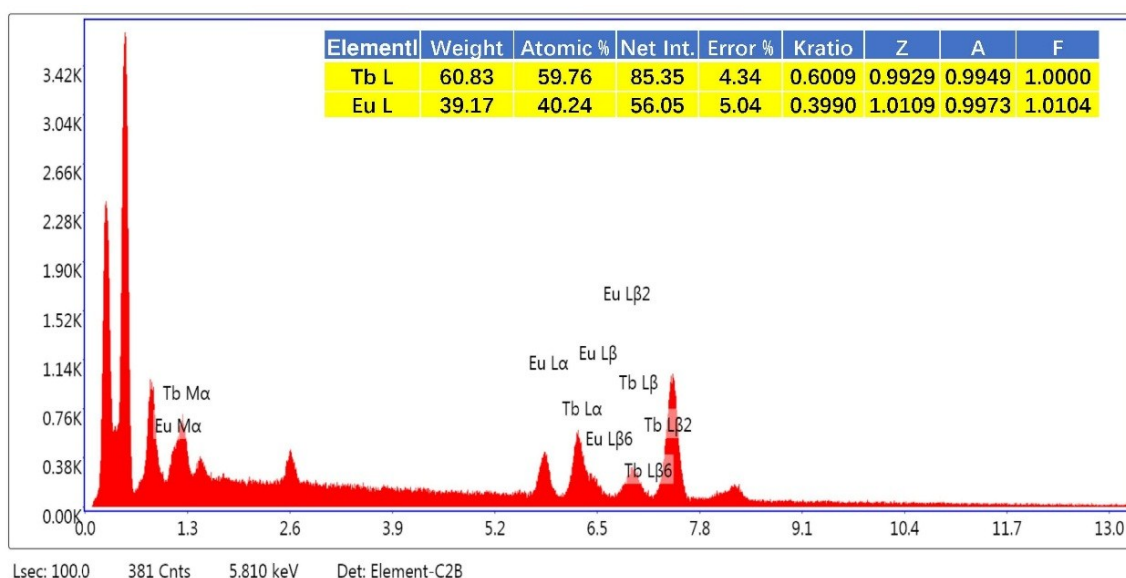

**Fig. S6.** EDS of  $\text{Tb}^{3+}$  and  $\text{Eu}^{3+}$  in  $\text{Tb}^{3+}_{0.6}/\text{Eu}^{3+}_{0.4}@/\text{Ni-BTC}$ .

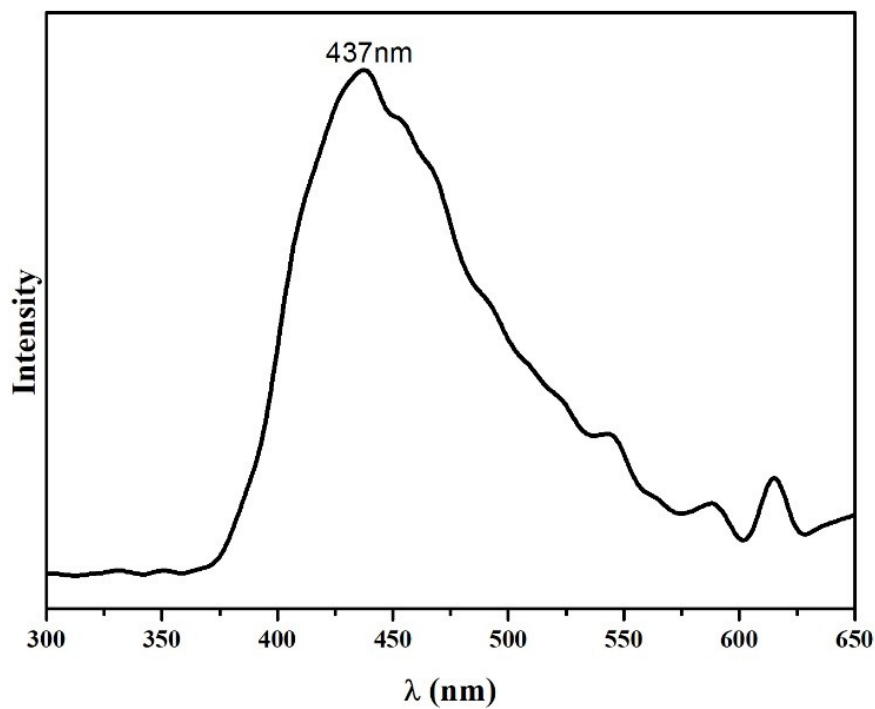

**Fig. S7.** The low-temperature phosphorescence spectrum of Gd-BTC under 270 nm excitation at 77 K.

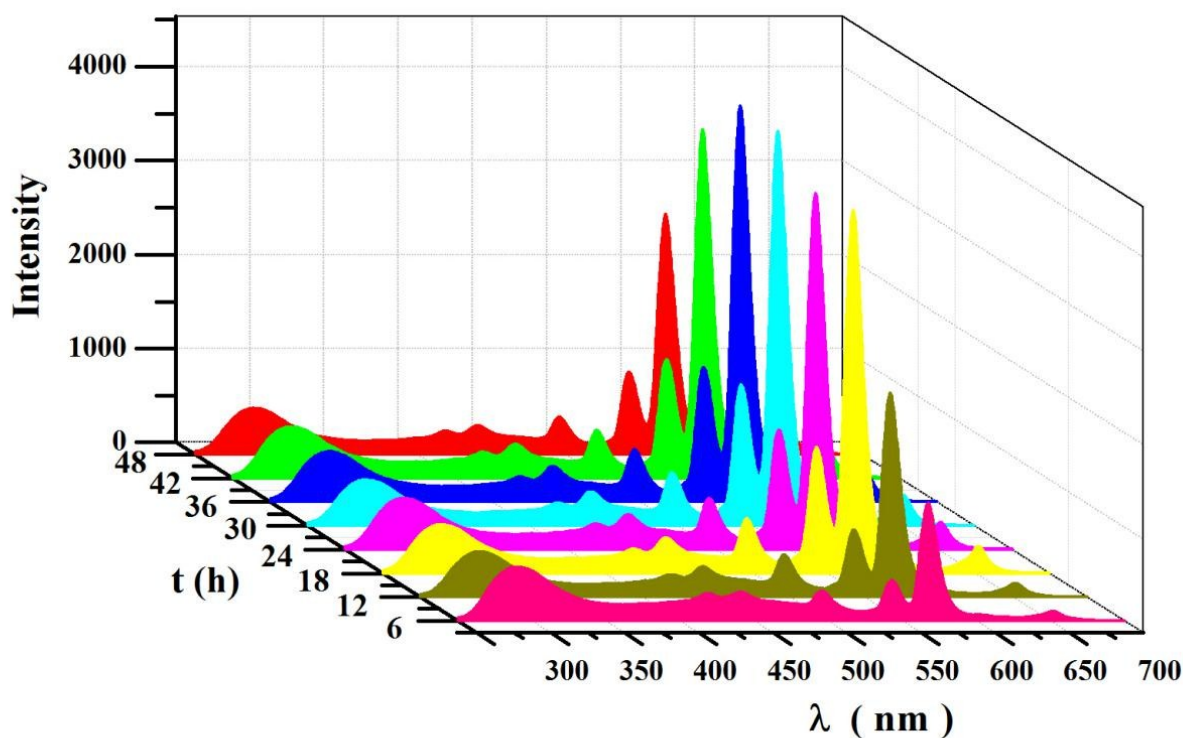

**Fig. S8.** The solid-state emission spectra of  $\text{Tb}^{3+}_{0.6}/\text{Eu}^{3+}_{0.4}@\text{Ni-BTC}$  ( $\lambda_{\text{ex}} = 270 \text{ nm}$ ) with soaking time of 6-42 h recorded at ambient temperature.

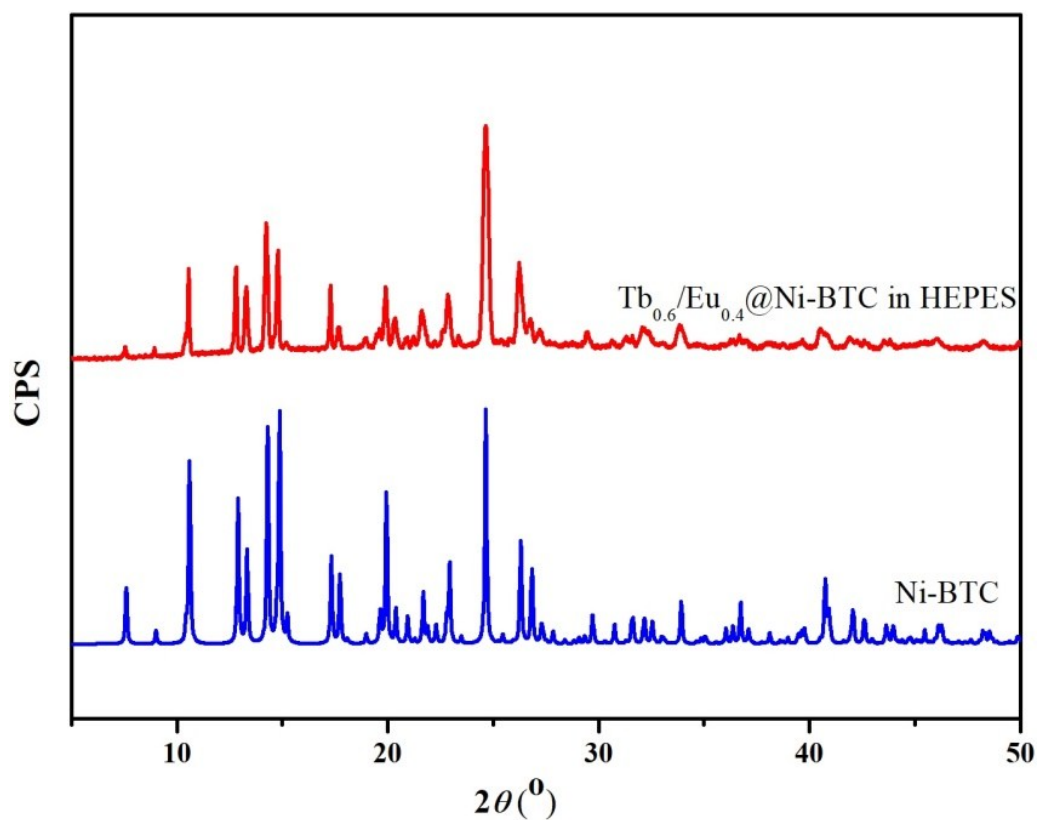

**Fig. S9** The PXRD patterns of Ni-BTC and  $\text{Tb}^{3+}_{0.6}/\text{Eu}^{3+}_{0.4}@\text{Ni-BTC}$  dispersed in HEPES buffer solution.

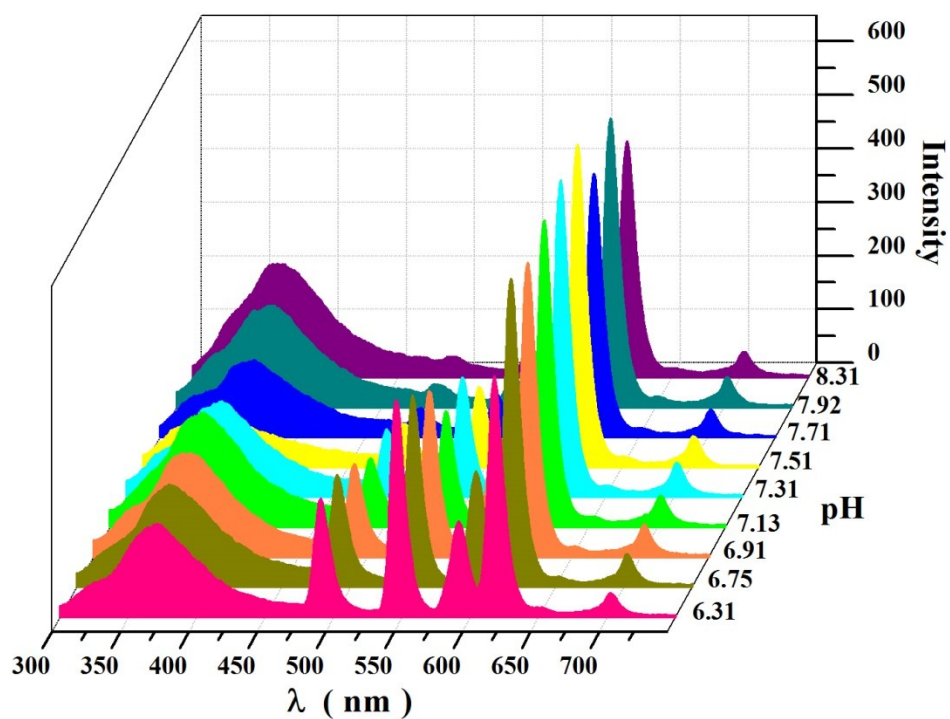

**Fig. S10.** The solid-state emission spectra of  $\text{Tb}^{3+}_{0.6}/\text{Eu}^{3+}_{0.4}@\text{Ni-BTC}$  ( $\lambda_{\text{ex}} = 270 \text{ nm}$ ) without DPA added depending on pH recorded at ambient temperature.

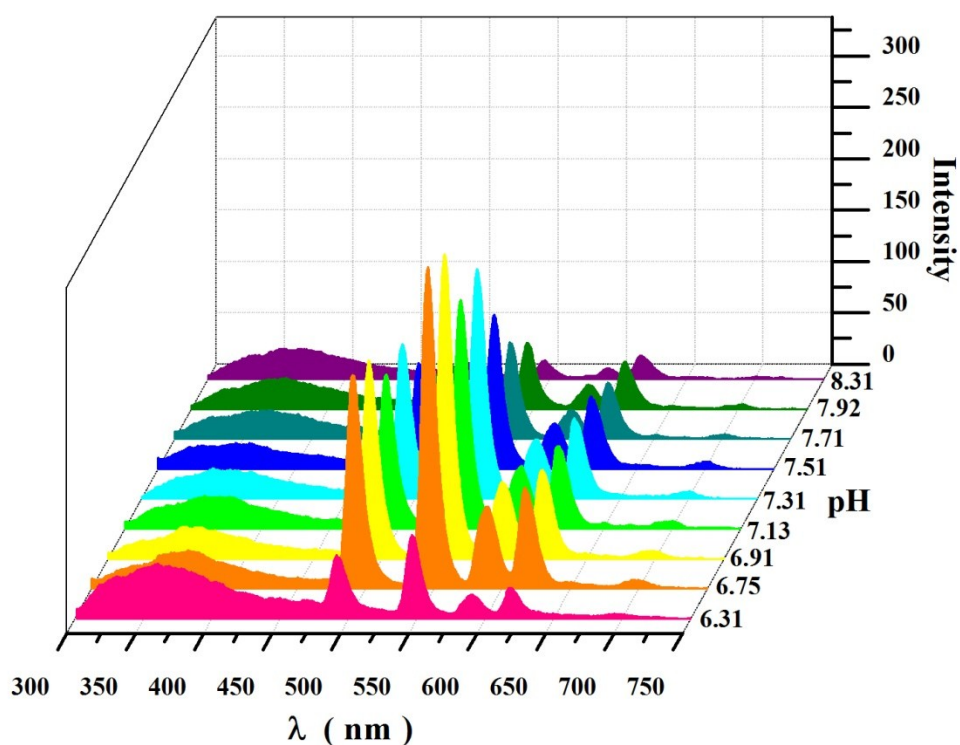

**Fig. S11.** The solid-state emission spectra of  $\text{Tb}^{3+}_{0.6}/\text{Eu}^{3+}_{0.4}@\text{Ni-BTC}$  ( $\lambda_{\text{ex}} = 270 \text{ nm}$ ) with DPA added depending on pH values recorded at ambient temperature.

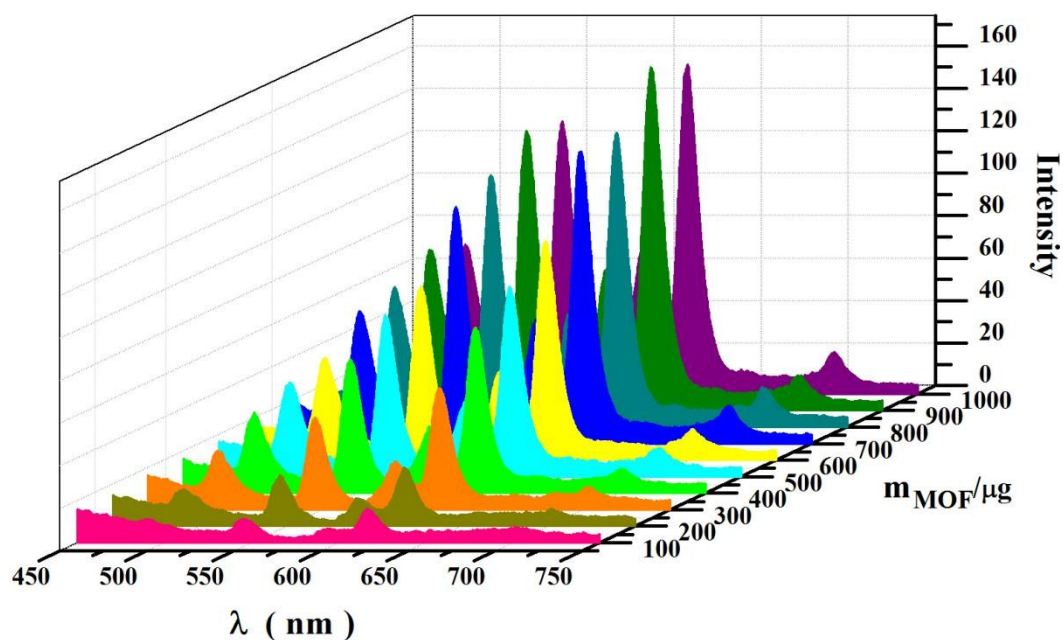

**Fig. S12.** The solid-state emission spectra of  $\text{Tb}^{3+}_{0.6}/\text{Eu}^{3+}_{0.4}@\text{Ni-BTC}$  ( $\lambda_{\text{ex}} = 270 \text{ nm}$ ) without DPA dropped depending on the dosage of  $\text{Tb}^{3+}_{0.6}/\text{Eu}^{3+}_{0.4}@\text{Ni-BTC}$  recorded at ambient temperature.



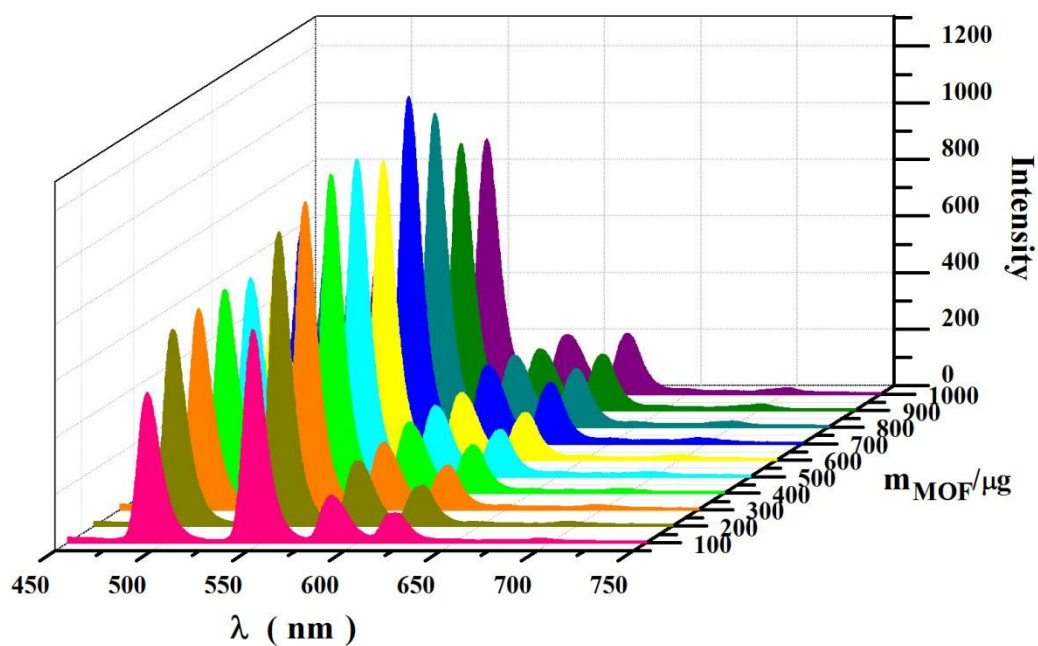

**Fig. S13.** The solid-state emission spectra of  $\text{Tb}^{3+}_{0.6}/\text{Eu}^{3+}_{0.4}@ \text{Ni-BTC}$  ( $\lambda_{\text{ex}} = 270$  nm) dropped with DPA depending on the dosage of  $\text{Tb}^{3+}_{0.6}/\text{Eu}^{3+}_{0.4}@ \text{Ni-BTC}$  recorded at ambient temperature.

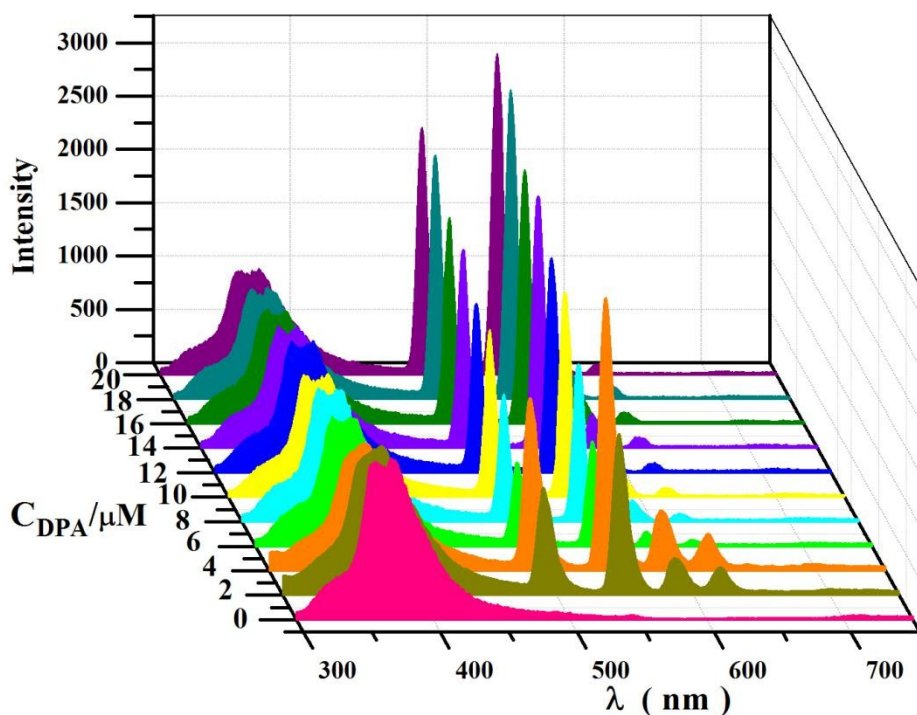

**Fig. S14.** The solid-state emission spectra of  $\text{Tb}^{3+}_{0.6}/\text{Eu}^{3+}_{0.4}@ \text{Ni-BTC}$  ( $\lambda_{\text{ex}} = 270$  nm) depending on  $C_{\text{DPA}}$  of 0-20  $\mu\text{mol/L}$  recorded at ambient temperature.

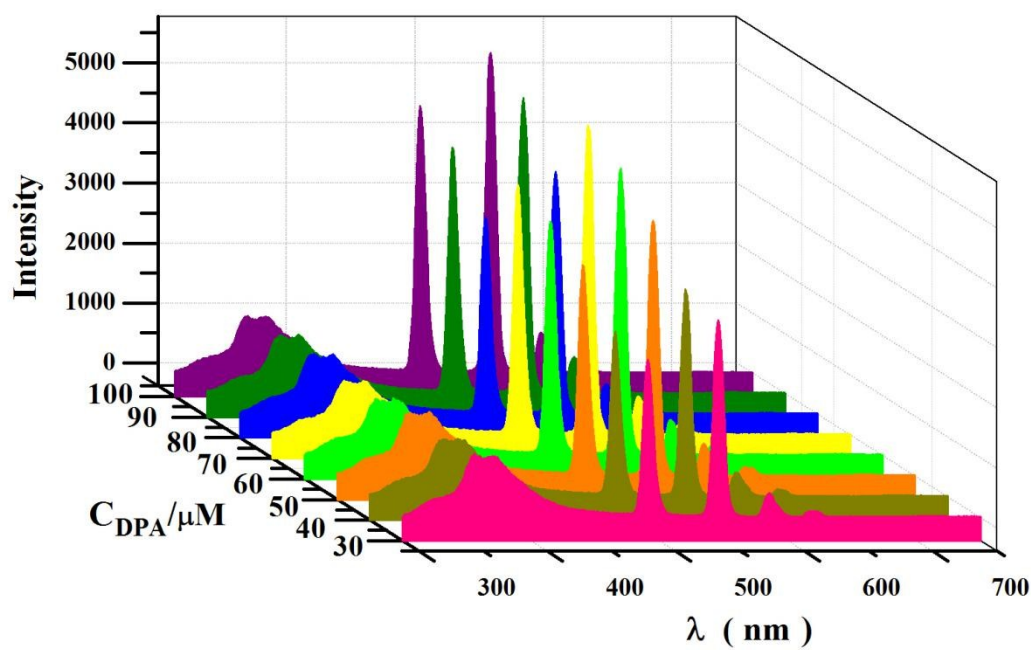

**Fig. S15.** The solid-state emission spectra of Tb<sup>3+</sup><sub>0.6</sub>/Eu<sup>3+</sup><sub>0.4</sub>@Ni-BTC ( $\lambda_{\text{ex}} = 270$  nm) depending on  $C_{\text{DPA}}$  of 30-100  $\mu\text{mol/L}$  recorded at ambient temperature.
